# Supplementary material for: Continuously tunable emission color based on the molecular aggregation of (2Z,2′Z)-2,2′-(1,4-phenylenae)bis(3-(4-(dodecyloxy)phenyl)acrylonitrile)
Source: Royal Society of Chemistry journal article supplement (doi:10.1039/c6ra22024j), 2016-01-01
Supplement: c6ra22024j1.pdf [file c6ra22024j1.pdf]

## Supporting Information

### Continuous Tunable Emission Based on the Molecular Aggregation of (2Z,2'Z)-2,2'-(1,4-phenylene)bis(3-(4-(dodecyloxy) phenyl)acrylonitrile

Hongbo Lu<sup>1,2,\*</sup> Chao Zhang<sup>1</sup> Xia Guo<sup>1</sup> Shaojun Wu<sup>1</sup> Guobing Zhang<sup>1</sup> Jiaxiang

Yang<sup>3</sup> Longzhen Qiu<sup>1,2,\*</sup>

<sup>1</sup> Key Lab of Special Display Technology, Ministry of Education, National Engineering Lab of Special Display Technology, State Key Lab of Advanced Display Technology, Academy of Opto-Electronic Technology, Hefei University of Technology, Hefei, 230009, People's Republic of China.

<sup>2</sup> Key Laboratory of Advanced Functional Materials and Devices, Anhui Province, School of Chemistry and Chemical Engineering, Hefei University of Technology, People's Republic of China.

<sup>3</sup> College of Chemistry and Chemical Engineering, Anhui University, Hefei, 230601, People's Republic of China.

\*Corresponding author. Tel:+8613855174354; E-mail address: bozhilu@hfut.edu.cn; lzhqiu@hfut.edu.cn.

Supplementary Figures

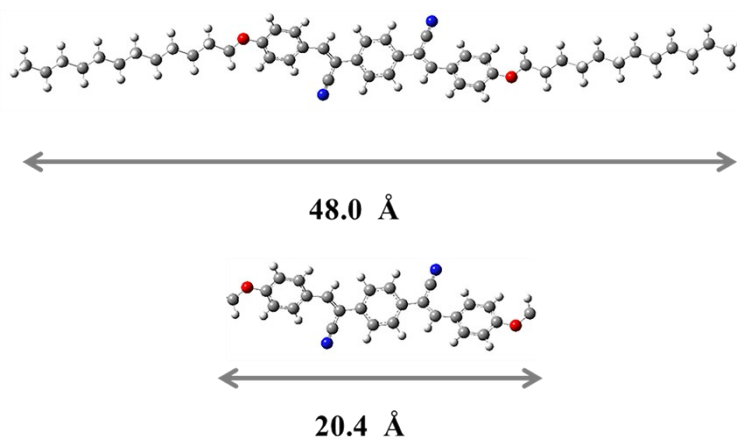

Fig. S1 Calculated optimized PDPA molecular structure.

**Quantum Chemical Calculations:** Single-molecule calculations in the gas phase were performed at the density functional theory (DFT) level of theory with the Gaussian 09 program. Herein, the ground-state geometry was fully optimized using the B3LYP functional and 3-21G basis set.

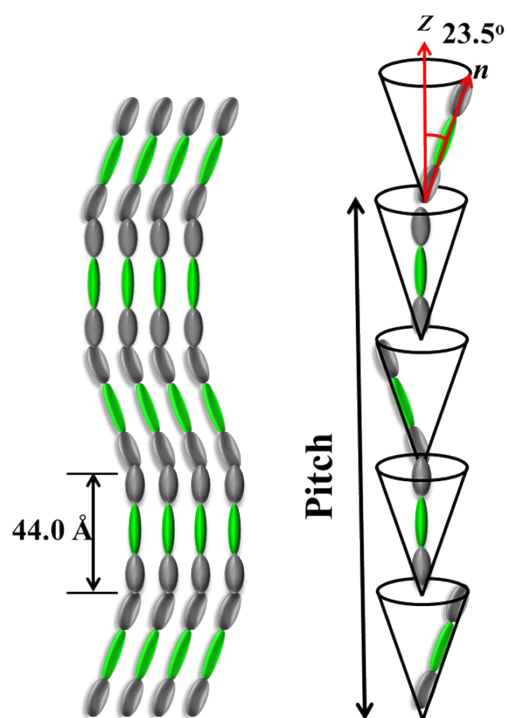

Fig. S2 Schematic illustration of the molecular arrangements in helical structure (phase I).

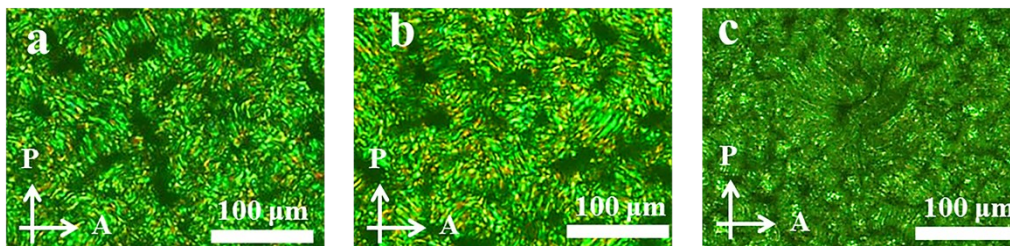

Fig. S3 PDPA POM images for cooling at 30 °C /min (a); at 40 °C /min (b); and at 50 °C /min (c).

**Table S1.** Fluorescence quantum yield of PDPA.

| Cooling rate(°C/min) | 0.5    | 5      | 10     | 20     | 30     | 40     | 50     |
|----------------------|--------|--------|--------|--------|--------|--------|--------|
| Absorb wavelength    | 308 nm | 318 nm | 319 nm | 333 nm | 345 nm | 355 nm | 356 nm |
| Emission wavelength  | 506 nm | 517 nm | 535 nm | 540 nm | 560 nm | 575 nm | 600 nm |
| QY                   | 26.37% | 50.18% | 54.26% | 55.9 % | 33.37% | 28.64% | 28.33% |

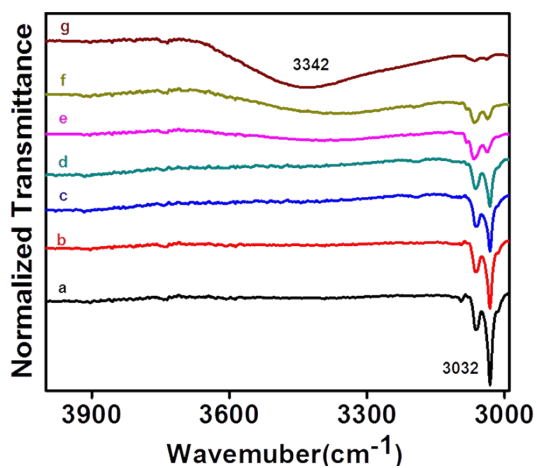

Fig. S4 PDPA IR spectra with different cooling rate:0.5 °C /min (a); 5 °C /min (b); 10 °C /min (c); 20 °C /min(d); 30 °C /min (e) ; 40 °C /min (f) ; and 50 °C /min (g).

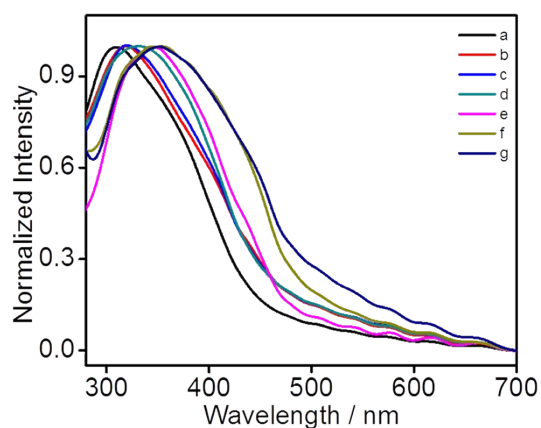

Fig. S5 PDPA UV absorption spectra with different cooling rate: at 0.5 °C /min (a); at 5 °C /min (b); at 10 °C /min (c); at 20 °C /min(d); at 30 °C /min (e ); at 40 °C /min (f); and at 50 °C /min (g).

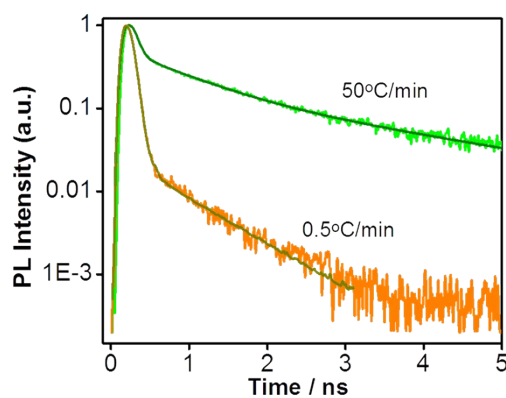

Fig. S6 Fluorescence decay profiles of PDPA film with the cooling rate ( $0.5\text{ }^{\circ}\text{C min}^{-1}$  and  $50\text{ }^{\circ}\text{C min}^{-1}$ ).

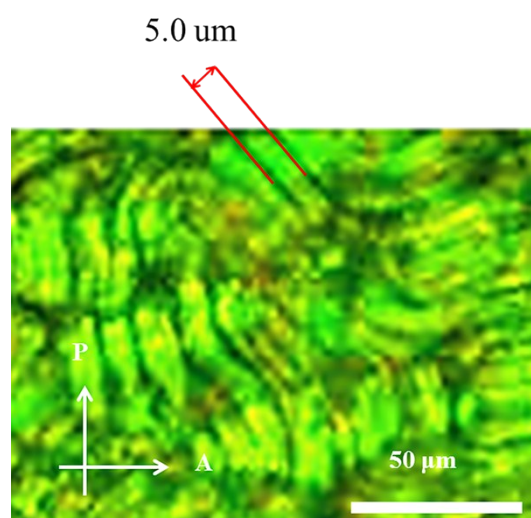

Fig. S7 The pitch length for the PDPA film with the cooling rate ( $0.5\text{ }^{\circ}\text{C min}^{-1}$ ).
